FALL 2024 | VOLUME 36 | NUMBER 4

The Journal of  
**Neuropsychiatry**  
and Clinical Neurosciences

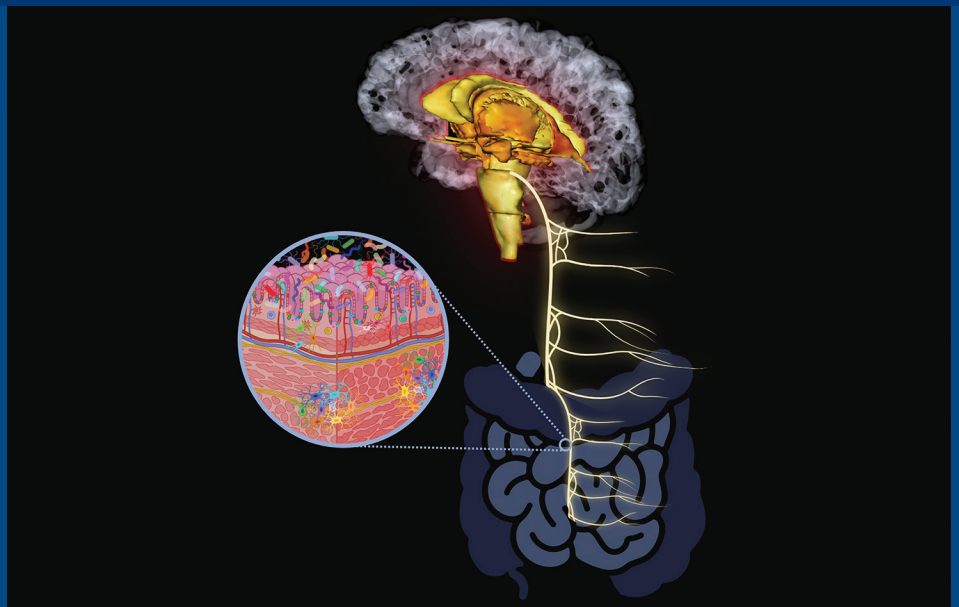

Treatment of Depression in Huntington's Disease: A Systematic Review

Apathy and Depression Among People Aging With Traumatic  
Brain Injury: Relationships to Cognitive Performance  
and Psychosocial Functioning

Relationship Between Hemorrhage Type and Development  
of Emotional and Behavioral Dyscontrol After  
Hemorrhagic Stroke

Rates and Predictors of Rapid Eye Movement Sleep  
Behavior Disorder Symptoms Among Post-9/11 Veterans

Socioemotional Dysfunction From Temporal Lobe Involvement  
in Frontotemporal Dementia: A Preliminary Report

Official Journal of the American Neuropsychiatric Association  
[psychiatryonline.org/journal/jnp](http://psychiatryonline.org/journal/jnp)
