# DSM-5-TR® DIAGNOSTIC CRITERIA APP

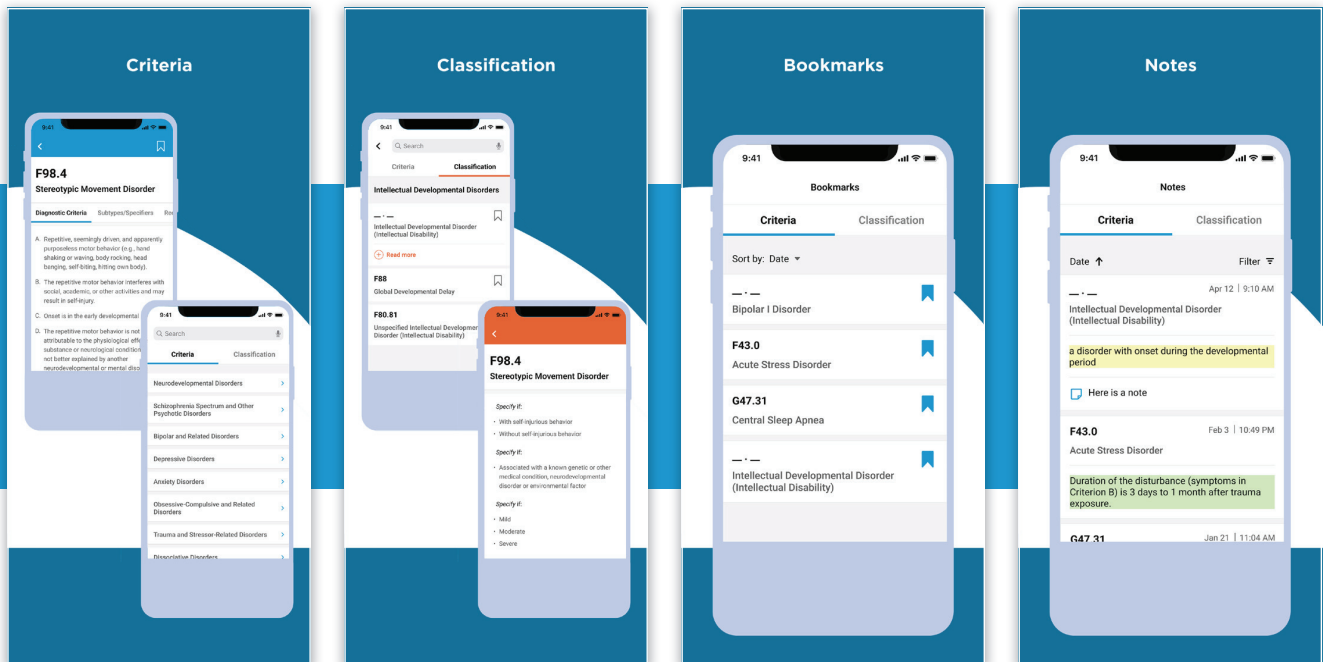

The new DSM-5-TR® Diagnostic Criteria Mobile App has been fully redesigned and is a concise companion to the ultimate psychiatric reference, *Diagnostic and Statistical Manual of Mental Disorders, Fifth Edition, Text Revision (DSM-5-TR®)*. It includes the fully revised diagnostic classification, as well as all the diagnostic criteria from DSM-5-TR® in an easy-to-use format. This handy reference provides mental health practitioners, researchers, and students quick access to the information essential to making a diagnosis.

## Features:

- Fully redesigned and updated user interface
- Improved presentation of tables and charts
- Dual-use modes for toggling between the diagnostic criteria and classification
- Up-to-date access to ICD-10-CM codes for clinical and administrative use
- Over 70 modified criteria sets with helpful clarifications since publication of DSM-5®
- Bookmark frequently used information and add notes for easy reference later.

Available for both **iOS** and **Android** compatible devices through the iTunes App store and Google Play.
